RESEARCH ARTICLE

# Effect of heat input on microstructure, wear and friction behavior of (wt.-%) 50FeCrC-20FeW-30FeB coating on AISI 1020 produced by using PTA welding

Cihan Özel<sup>1\*</sup>, Turan Gürgeç<sup>2</sup>

**1** Department of Mechanical Engineering, Firat University, Engineering Faculty, Elazig, Turkey,

**2** Department of Automotive Engineering, Firat University, Technology Faculty, Elazig, Turkey

\* [cozel@firat.edu.tr](mailto:cozel@firat.edu.tr)

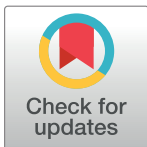

## Abstract

In this study, AISI 1020 steel surface was coated in different heat inputs with (wt.-%) 50FeCrC-20FeW-30FeB powder mixture by using plasma transferred arc (PTA) welding method. The microstructure of the coated samples were investigated by using optical microscope (OM), scanning electron microscope (SEM), X-ray diffraction (XRD) and energy dispersive X-ray (EDS). The hardness was measured with micro hardness test device. The dry sliding wear and friction coefficient properties were determined using a block-on-disk type wear test device. Wear tests were performed at 19.62 N, 39.24 N, 58.86 N load and the sliding distance of 900 m. The results were shown that different microstructures formed due to the heat input change. The highest average micro hardness value was measured at 1217 HV on sample coated with low heat input. It was determined that the wear resistance decreased with increasing heat input.

## OPEN ACCESS

**Citation:** Özel C, Gürgeç T (2018) Effect of heat input on microstructure, wear and friction behavior of (wt.-%) 50FeCrC-20FeW-30FeB coating on AISI 1020 produced by using PTA welding. PLoS ONE 13(1): e0190243. <https://doi.org/10.1371/journal.pone.0190243>

**Editor:** Jun Xu, Beihang University, CHINA

**Received:** October 16, 2017

**Accepted:** December 11, 2017

**Published:** January 11, 2018

**Copyright:** © 2018 Özel, Gürgeç. This is an open access article distributed under the terms of the [Creative Commons Attribution License](https://creativecommons.org/licenses/by/4.0/), which permits unrestricted use, distribution, and reproduction in any medium, provided the original author and source are credited.

**Data Availability Statement:** All relevant data are within the paper.

**Funding:** The authors thank the Firat University Research Fund (FUBAP-MF.15.09) for their financial contribution to this research.

**Competing interests:** The authors have declared that no competing interests exist.

## Introduction

The wear is very important for performance and service life of metallic machine parts [1]. The protection of metallic machine parts against wear has significance for economic approach [2]. Surface coating is one of the most useful and economic method for protect machine parts against wear [3, 4]. Surface coating is generally used industries, such as agricultural, mining and soil [5]. Plasma transferred arc (PTA) welding plays important role on the surface coating technology. PTA welding method has some advantages such as high energy density, excellent arc stability, high deposition rate, high welding speeds, lower heat input, low thermal distortion of the parts and low cost equipment [6–8].

Fe-Cr-C coating is known good wear and corrosion resistance by the formation of  $M_7C_3$  and  $M_{23}C_6$  carbides [9, 10]. Fe-Cr-B-C and Fe-Cr-W-B-C coatings are known as wear resistance coatings [11, 12]. The influence of heat input on microstructure and wear were investigated in many studies [13, 14]. Also in some studies it was investigated that the molecular dynamics of coating process [15, 16].

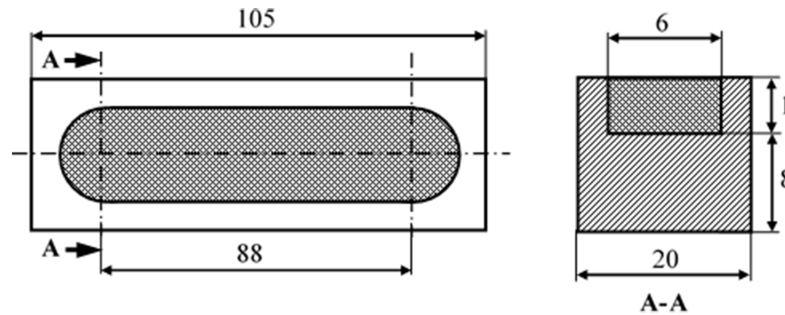

Fig 1. Dimensions of the substrate material (mm).

<https://doi.org/10.1371/journal.pone.0190243.g001>

In the literature no more studies Fe-Cr-W-B-C coating on AISI 1020 steel by using PTA welding method was encountered. In this research, Fe-Cr-W-B-C coating with high content of FeB and FeW were coated on low carbon steel surface by using PTA welding method. After the microstructure of the coatings had been analyzed by the OM, SEM, EDS and XRD methods, the microhardness, wear and friction coefficient properties of the coating layers were determined. Finally the worn surfaces were investigated by using SEM microscope.

### Experimental details

In this study, commercially buying AISI 1020 steel was used as substrate material and prepared dimensions in CNC milling machine which were given in Fig 1. For surface alloying materials FeCrC (buying from Eti Krom co inc.Turkey), FeB (buying from AVEKS AS) and FeW (buying from AVEKS AS) were used and ferro alloys were grinding approximately 38 μm size. The chemical compositions of AISI 1020 steel and ferro alloys were given in Table 1.

The surface of the substrate material was cleaned with acetone before coating and dried in the furnace at 60 °C for 30 minutes. The ferro alloy powders were dried in the furnace at 110 °C for 1 hour to remove the moisture. These powders containing wt.-% 50FeCrC-20FeW-30FeB, were weighed with a precision scale and this mixture was stirred for 1 hour at 150 rpm/min in a mechanical stirrer and placed in to the channel with alcohol. Samples were placed in the furnace and kept there at 100 °C for 1 hour to remove the moisture. After the samples had been removed from the furnace, they were kept until the room temperature was reached and the surface coating processes were done by using the Thermal Dynamics WC100B brand PTA welding device with the parameters given in Table 2. After the coating process the samples were put on to cool at room temperature. Other details of experiments were given in our previous study [17].

The wear rates were found by using Eq 1. During the wear test the change in friction force dependent on the sliding distance was recorded and transferred to the computer via a data logger. Finally, the worn coating surfaces were analyzed using a SEM microscope.

$$Wear\ rate = (m_f - m_l) / m_f \tag{1}$$

where  $m_f$  (g) is the initial mass of the sample and  $m_l$  (g) is the mass after wear.

Table 1. Chemical compositions of materials (wt.-%).

| Material  | Cr    | B     | C     | P     | Si    | W     | Mn    | Fe   |
|-----------|-------|-------|-------|-------|-------|-------|-------|------|
| AISI 1020 | -     | -     | 0.20  | 0.02  | 0.286 | -     | 0.356 | Bal. |
| FeCrC     | 66.77 | -     | 7.95  | 0.007 | 0.550 | -     | -     | Bal. |
| FeW       | -     | -     | 0.045 | 0.05  | 0.520 | 79.26 | -     | Bal. |
| FeB       | -     | 18.22 | 0.30  | 0.05  | 0.500 | -     | -     | Bal. |

<https://doi.org/10.1371/journal.pone.0190243.t001>

**Table 2. Coating parameters.**

| Sample                                  | S1    | S2    | S3    | S4    |
|-----------------------------------------|-------|-------|-------|-------|
| Current (A)                             | 140   | 160   | 140   | 160   |
| Coating speed (m/min)                   | 0.15  | 0.15  | 0.1   | 0.1   |
| Voltage (V)                             | 19–20 |       |       |       |
| Plasma gas (Argon) flow rate (l/min)    | 0.5   |       |       |       |
| Shielding gas (Argon) flow rate (l/min) | 8     |       |       |       |
| Coating length (mm)                     | 2     |       |       |       |
| Heat input (kj/mm)                      | 0.585 | 0.704 | 0.878 | 1.056 |

<https://doi.org/10.1371/journal.pone.0190243.t002>

## Results and discussion

### Microstructure

The macro photographs of the coating surfaces was shown in Fig 2. It could be seen that there is no crack or porosity on the coated surfaces and that the surface is modified with the melting of Fe-Cr-W-B-C reinforcing powder mixture with the substrate material. In Table 3 some coating properties were given. As it seen coating layers depths and interface regions heights increased with increasing heat input.

The OM photographs of the coating layers were shown in Fig 3. As it seen there are no cracks, porosity, and gaps between AISI 1020 and the coating region. As it seen, different microstructures appeared in the coatings with the change of heat input. This can be explained by the change of the melting amount of the substrate material with the change of heat input and the chemical composition of the coating. Coating layer of S1 consists of mainly borides and hexagonal and strip-shaped carbides (Fig 3A). Also the amounts of carbides and borides in the coating layer are high. S2's coating layer consists of mainly fine dendrites and eutectics (Fig 3B). Because of increasing melting density of substrate material with the increased heat input and the rapid cooling, S3 and S4's coating layers consist of dendrites and interdendritic eutectics.

XRD analysis results of coated samples were shown in Fig 4. According to the XRD results, all coating layers mainly compose of  $M_{23}(C, B)_6$  ( $M = Cr, Fe, W$ ) carbide,  $M_7C_3$  ( $M = Cr, Fe, W$ ) carbide,  $(Cr, Fe)B$  boride, FeB boride and FeCr. As can be seen from the XRD analysis results The size intensity and form of phases in the coating layers vary depending on the changing heat input and different solidification times [18].

The SEM photographs of coating layers were shown in Fig 5. EDS results taken from point 1 (Fig 5A) which contains wt.-% 30.20C-25Cr-39.67Fe-5.13W elements. According to the Cr/

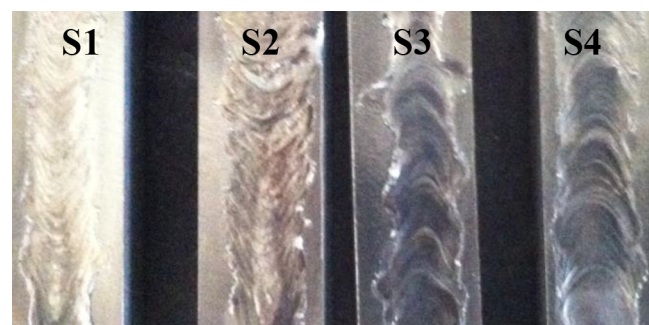

**Fig 2. Macro photographs of coating surfaces.**

<https://doi.org/10.1371/journal.pone.0190243.g002>

**Table 3. Coating properties.**

| Sample | H (μm) | h (μm) |
|--------|--------|--------|
| S1     | 1440   | 2.24   |
| S2     | 1510   | 8.02   |
| S3     | 1610   | 13.06  |
| S4     | 1690   | 14.26  |

H: Coating maximum depth; h: Average interface height taken from five different points

<https://doi.org/10.1371/journal.pone.0190243.t003>

Fe ratio this phase was thought to be  $M_{23}(C,B)_6$  ( $M = Cr, Fe, W$ ) carbide [19, 20]. Eutectic phase (Fig 5A-point 2) contains wt.-% 29.89C-12.25Cr-48.36Fe-9.49W elements and strip-shaped carbide (Fig 5A-point 3) contains wt.-% 31.40C-15.95Cr-46.26Fe-6.39W elements. The phase in Fig 5B point 4 is boride and it contains wt.-% 31.16C-24.63Cr-44.22Fe elements. According to the EDS results this boride was thought to be (Cr, Fe)B boride. Eutectic phase (Fig 5C-point 5) contains wt.-% 17.16C-13.51Cr-61.43Fe-7.9W elements and dendritic phase (Fig 5C-point 6) contains wt.-% 23.55C-15.74Cr-55.46Fe-5.25W. EDS results taken from point 7 and 9 the dendrites contains wt.-% 19.00C-6.41Cr-71.74Fe-2.86W and wt.-% 16.23C-6.40Cr-73.88Fe-3.49W elements respectively. Eutectic phases in Fig 5D-point 8 consists of wt.-% 14.16–15.12Cr-63.43Fe-7.29W and Fig 5E-point10 consists of wt.-% 16.65C-13.02Cr-64.41Fe-5.92W elements. It was concluded that an increase in heat input eutectic phases leads to increased amount of Fe elements.

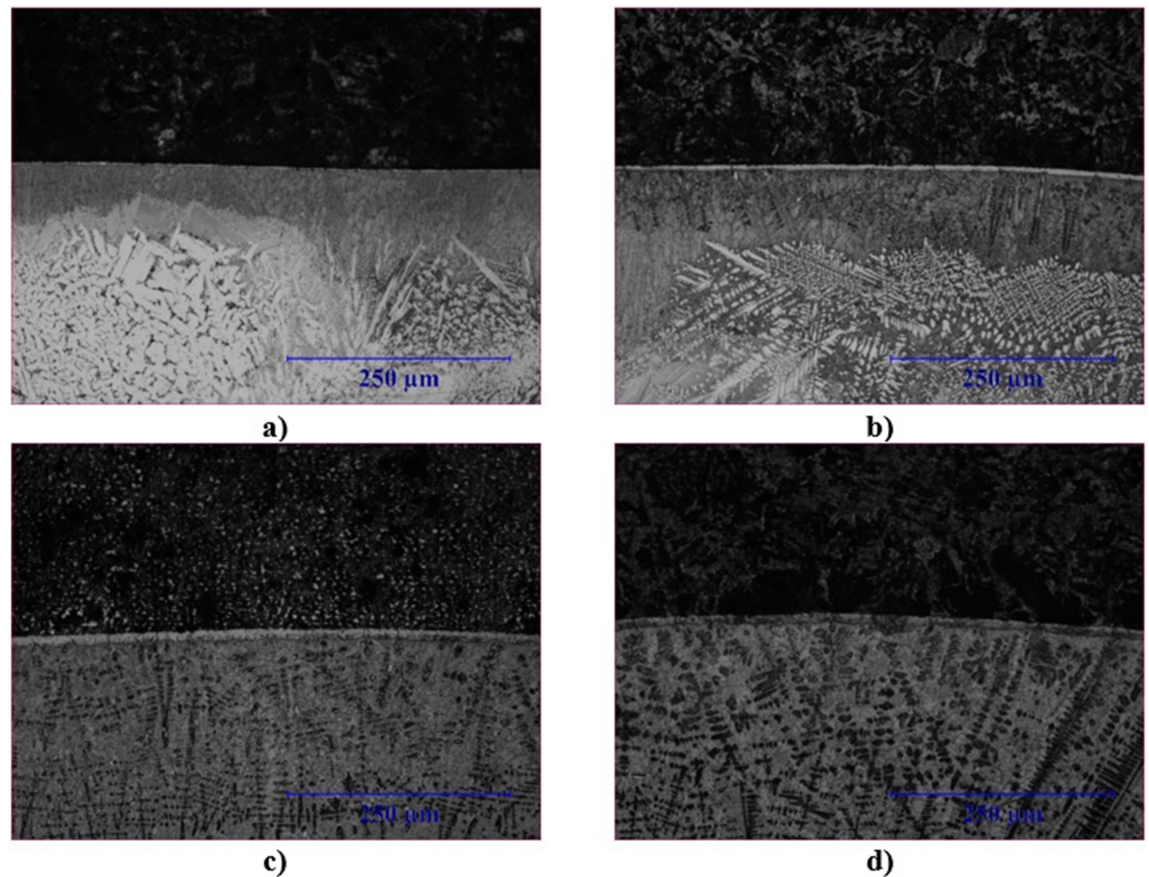

**Fig 3. OM photographs of coating layers (x200).**

<https://doi.org/10.1371/journal.pone.0190243.g003>

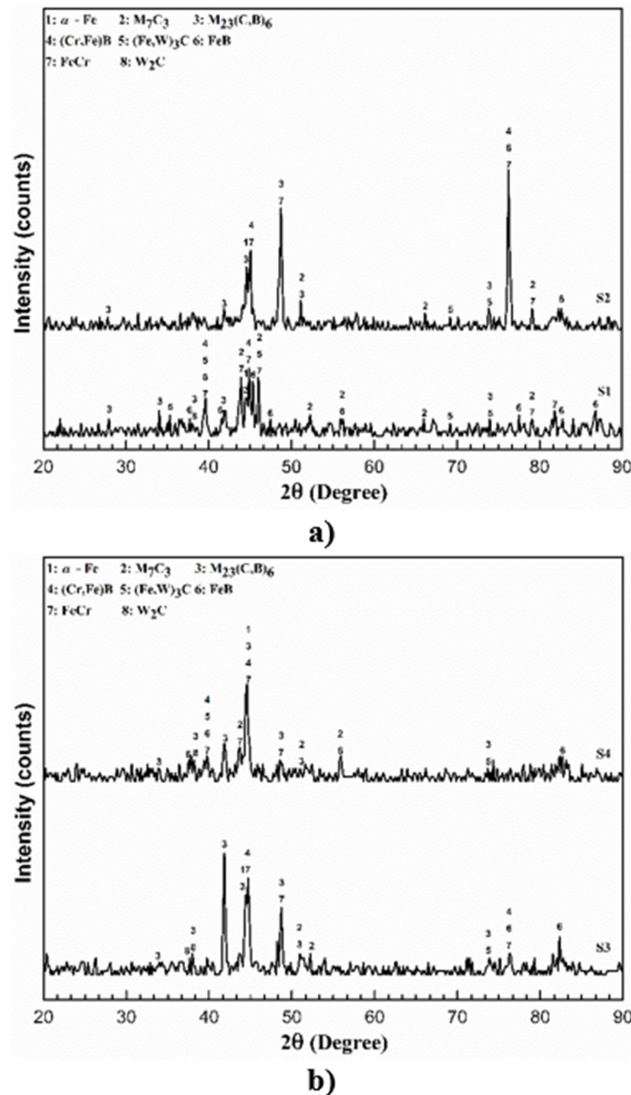

Fig 4. XRD results.

<https://doi.org/10.1371/journal.pone.0190243.g004>

### Microhardness

The average and maximum microhardness of the coating layers were given in Table 4. The coated samples microhardness are higher than the AISI 1020 due to the hard carbide and boride phases. Coating layers average microhardness were changed between 725–1217 HV and decreased with increasing heat input. Maximum microhardness were measured at 1390 HV in S1 which is coated with lowest heat input. The microhardness distribution of coating layers were seen in Fig 6. The dendritic coating layers microhardness changed insignificantly from top surface to substrate.

### Friction and wear

The wear rates of the substrate material and surface coated samples at different loads were shown in Figs 7–9. The wear behaviors of all coated samples were different from each other and the wear rates of all samples are lower than AISI 1020 at all load values. Wear resistance was

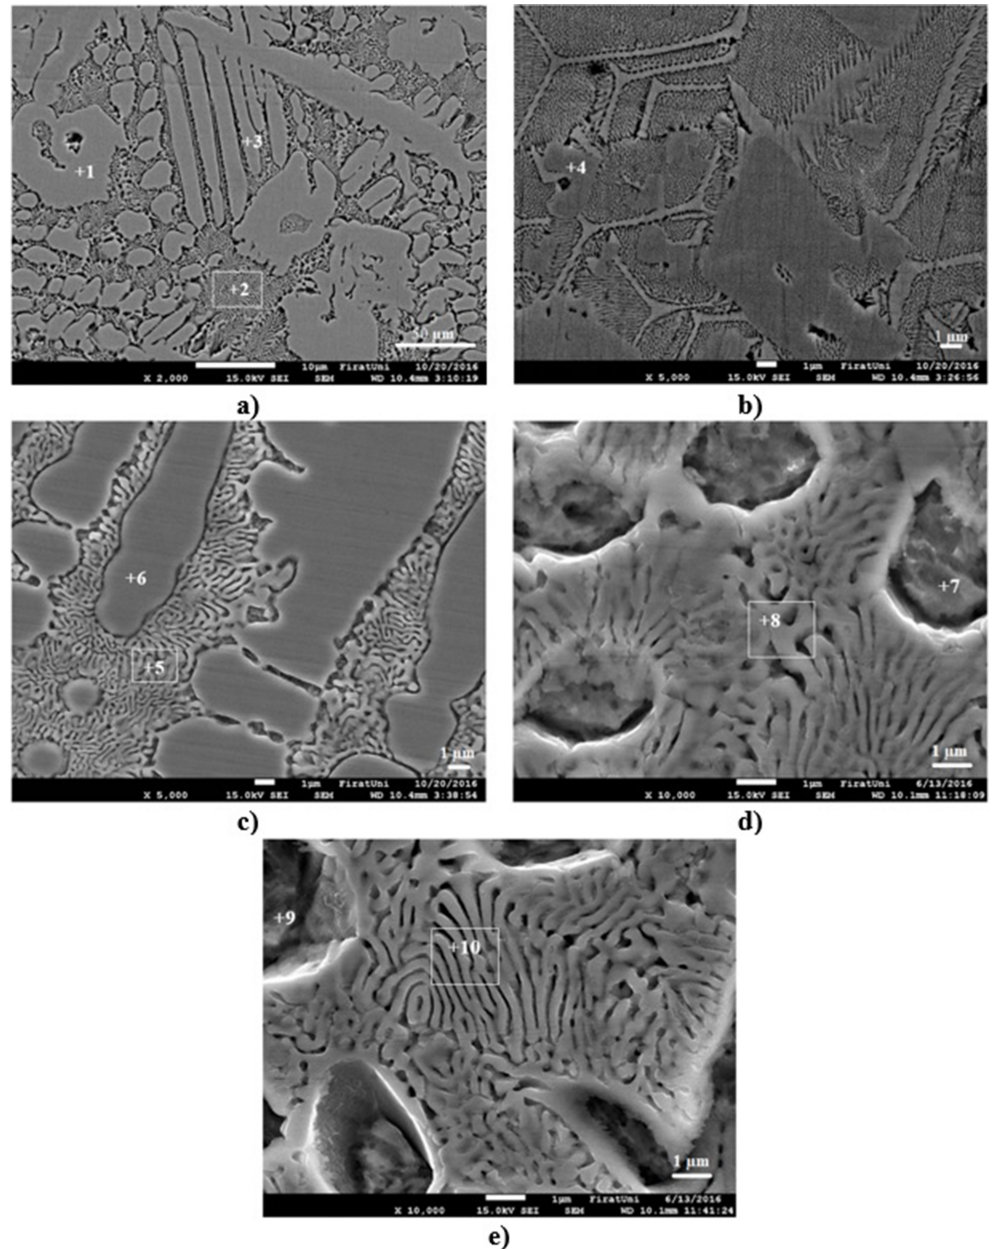

**Fig 5. SEM photographs of coating layers. a) S1 (x2000), b) S1 (x5000), c) S2 (x5000), d) S3 (x10000) and e) S4 (x10000).**

<https://doi.org/10.1371/journal.pone.0190243.g005>

**Table 4. Average and maximum microhardness of coating layers.**

| Sample | V           | A     | Q           | HV <sub>(avg.)</sub> | HV <sub>(max.)</sub> |
|--------|-------------|-------|-------------|----------------------|----------------------|
| S1     | 0.15 m/min. | 140 A | 0.585 kJ/mm | 1217 HV              | 1390 HV              |
| S2     | 0.15 m/min. | 160 A | 0.704 kJ/mm | 1030 HV              | 1107 HV              |
| S3     | 0.1 m/min.  | 140 A | 0.878 kJ/mm | 795 HV               | 899 HV               |
| S4     | 0.1 m/min.  | 160 A | 1.056 kJ/mm | 725 HV               | 797 HV               |

V: Coating speed (m/min.); A: Current (A); Q: Heat input (kJ/mm); HV<sub>(avg.)</sub>: Average microhardness of coating layer; HV<sub>(max.)</sub>: Maximum microhardness.

<https://doi.org/10.1371/journal.pone.0190243.t004>

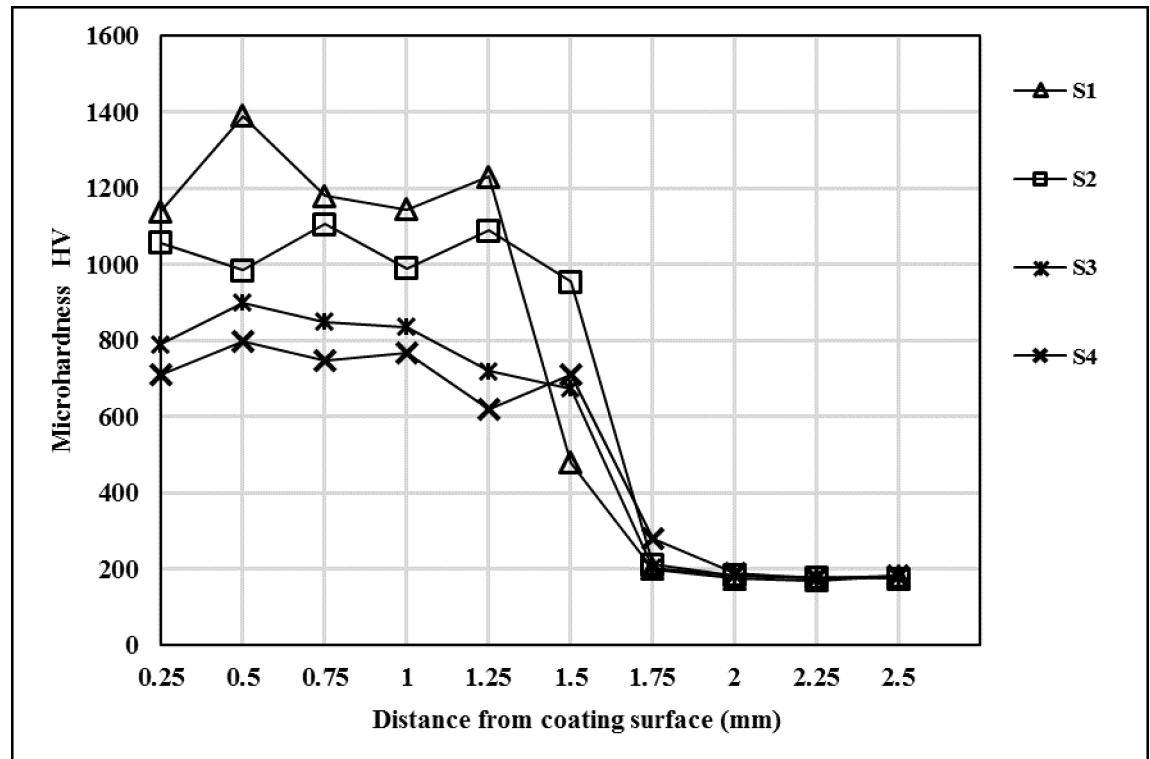

Fig 6. Microhardness distribution of coating layers.

<https://doi.org/10.1371/journal.pone.0190243.g006>

decreased with increasing heat input, due to intensive melting of substrate material. So the ratio of alloying elements (Cr, W and B) were decreased in melting pool and carbide and boride ratios were decreased because of this. With decreasing carbide and boride amounts in coating layer's, the hardness was decreased. It is known that hardness has good effect on the wear resistance [18]. The wear resistance of AISI 1020 was increased with increasing sliding distance from 600 m to 900 m at 19.62 N load (Fig 7). The samples, which has high hardness (S1 and S2), wear resistances were increased with increasing sliding distance from 300 to 900 m. Other samples (S3 and S4) wear resistances were increased first and decreased with increasing sliding distance from 600 to 900 m (Fig 7). At 39.24 N load, the wear resistances of AISI 1020 and coated samples were decreased with increasing sliding distance (Fig 8). At 58.86 N load, S1's and S2's wear resistances were increased with increasing sliding distance. Also AISI 1020's, S1's and S2's wear resistances were decreased first and then increased with increasing sliding distance from 600 to 900 m (Fig 9). At all load values sample S1, which is coated with lowest heat input, has highest wear resistance. It can be explained by the highest hardness of S1 and the higher ratio of hard boride and carbide phases than the other samples. The sample S4 has the lowest wear resistance which is the most soft sample due to the intensive melting of AISI 1020.

The change in wear rates according to the normal load was seen in Fig 10. The wear resistance of the AISI 1020 decreased when the load increased to 39.24 N while it increased when the load increased to 58.86 N. It can be said that this is caused by the strain hardening and increasing temperature occurred in the substrate material's sliding surface due to friction [21, 22]. The wear resistances of all coated samples increased when the load increased to 39.24 N and decreased when the load increased to 58.86 N.

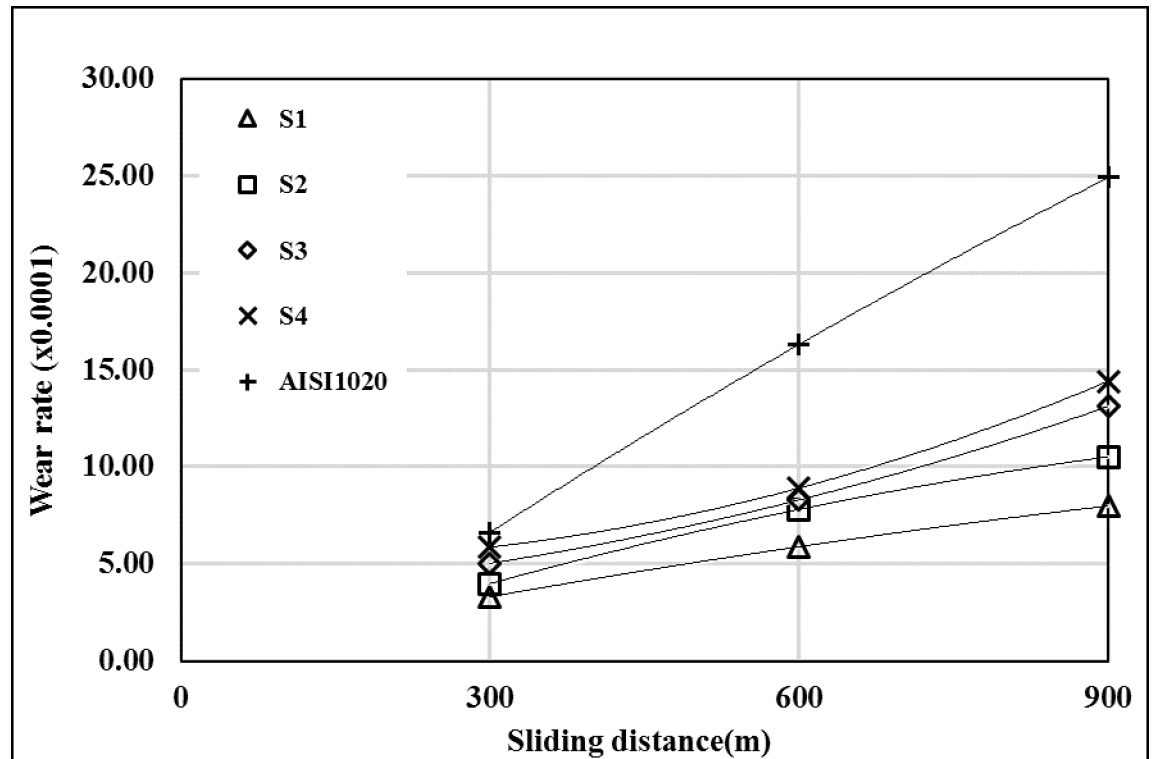

Fig 7. Wear rates at 19.62 N load. (The wear rate is found by multiplying the value of x-axis by 0.0001).

<https://doi.org/10.1371/journal.pone.0190243.g007>

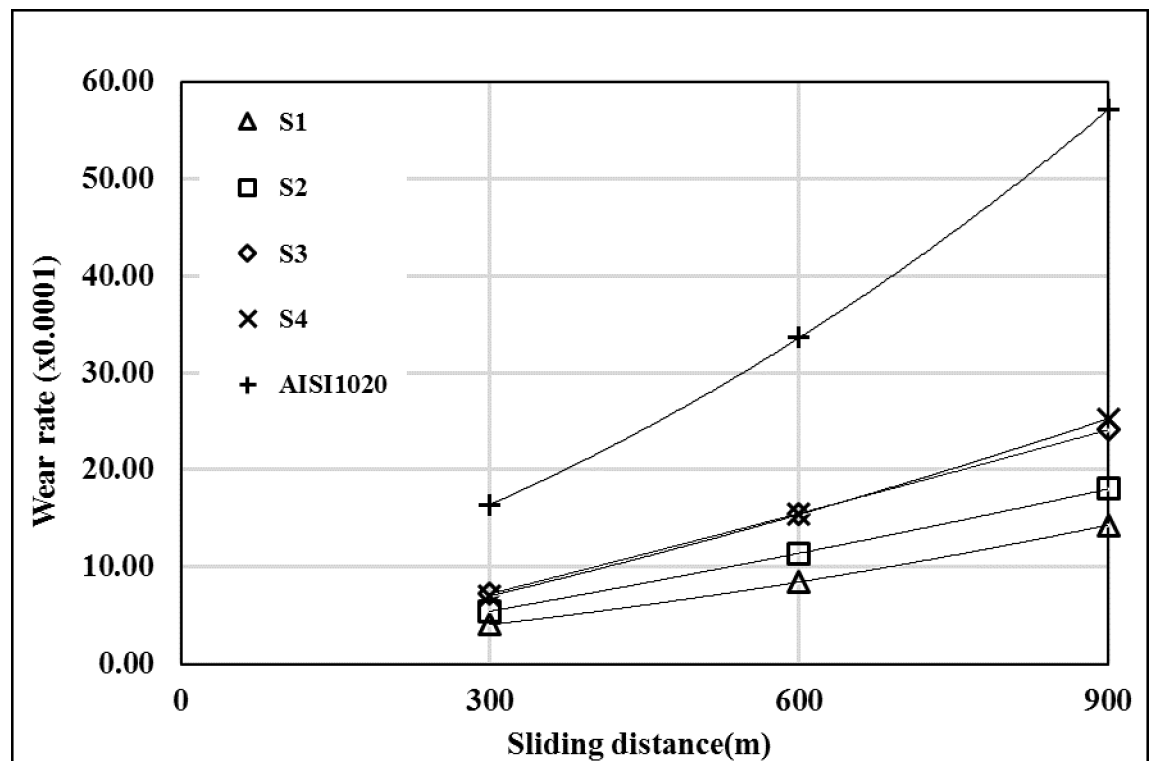

Fig 8. Wear rates at 39.24 N load. (The wear rate is found by multiplying the value of x-axis by 0.0001).

<https://doi.org/10.1371/journal.pone.0190243.g008>

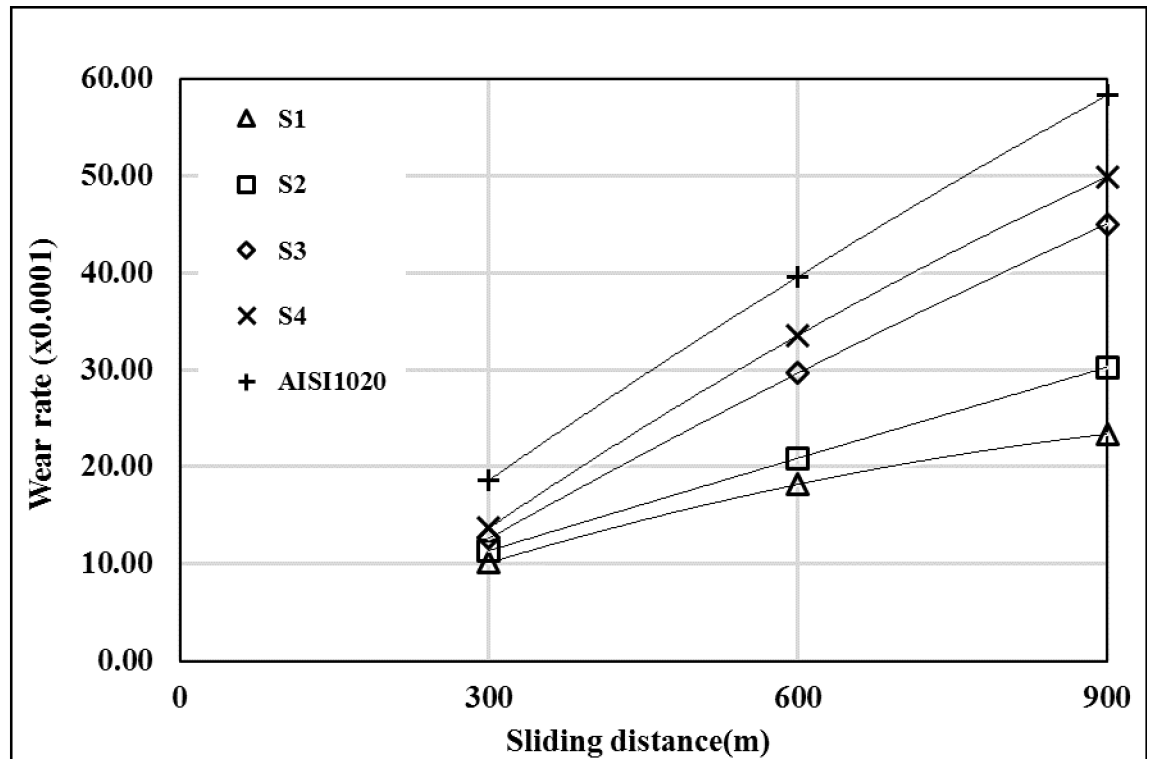

Fig 9. Wear rates at 58.86 N load. (The wear rate is found by multiplying the value of x-axis by 0.0001).

<https://doi.org/10.1371/journal.pone.0190243.g009>

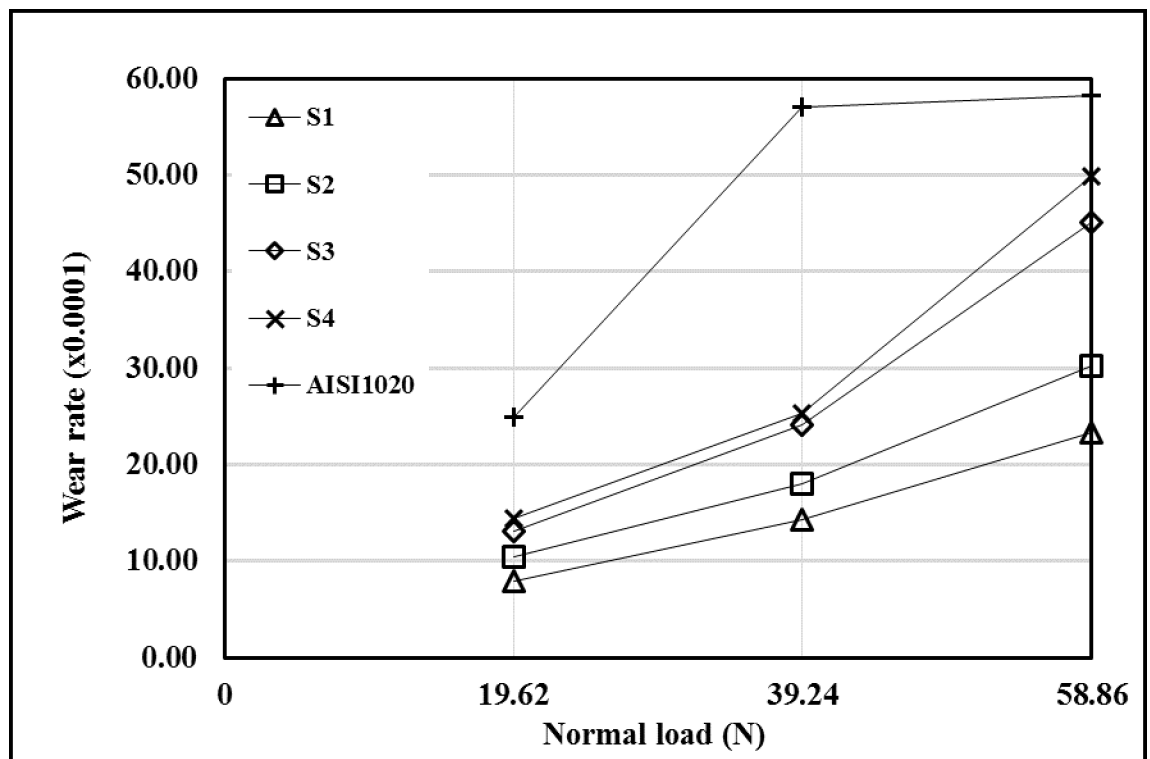

Fig 10. Wear rates according to normal load. (The wear rate is found by multiplying the value of x-axis by 0.0001).

<https://doi.org/10.1371/journal.pone.0190243.g010>

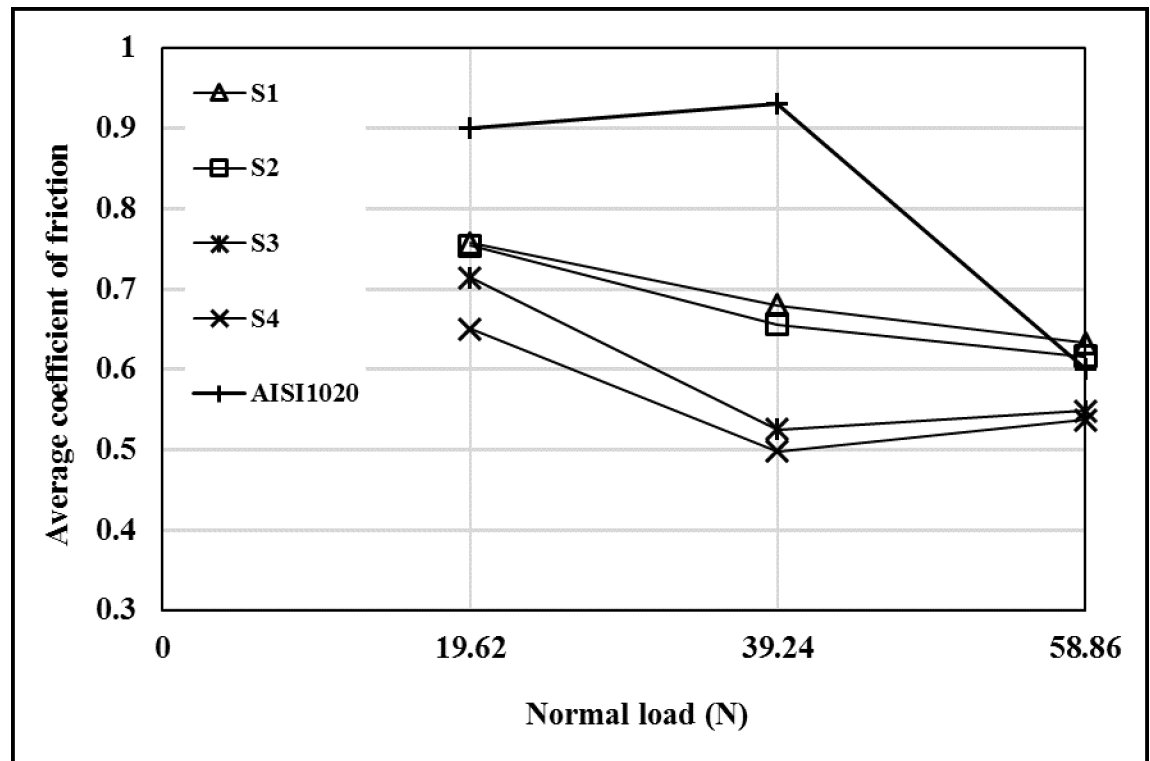

Fig 11. The variation of average coefficient of frictions according to load.

<https://doi.org/10.1371/journal.pone.0190243.g011>

The variation of average friction coefficients ( $\mu_{avg.}$ ) according to the load was shown in Fig 11. The  $\mu_{av.}$  values of the coated samples and AISI 1020 vary with the change of the load. It has also been pointed out in the previous studies that the average coefficient of friction varies depending on the load [23]. The samples with higher average microhardness have higher  $\mu_{avg.}$  values and as the heat input increases the  $\mu_{avg.}$  decreased. At 19.62 and 39.24 N load, the  $\mu_{avg.}$  values of all coated samples are lower than that of substrate. The average friction coefficients of samples coated with high heat input (S1 and S2) compared to other specimens at 58.86 N load are lower than that of AISI 1020. The  $\mu_{avg.}$  values of the coated samples vary between 0.650–0.757 at 19.62 N load, 0.498–0.680 at 39.24 N load and 0.537–0.633 at 58.86 N load. Also the  $\mu_{avg.}$  values of the AISI 1020 is 0.9 at 19.62 N load, 0.93 at 39.24 N load and 0.6 at 58.86 N load.

The wear surface SEM photographs of the coated samples and substrate worn at high load (58.86 N) were seen in Fig 12. Significant amounts of the material were lost from AISI 1020 (Fig 12A). Wide and deep craters were observed on the worn surfaces of AISI 1020. It was determined that the particles broken from the sliding surface were stuck to the grooves formed on the surface at 58.86 N load due to the high temperature. When the wear surface photographs of the coated samples were examined (Fig 12B–12E), it was observed that the worn surfaces consisted of mostly grooves and micro scratching. Spalling formed on worn surfaces somewhere and the grooves flattened with increasing wear (Fig 12E).

## Conclusions

- The surface of AISI 1020 was successfully modified with Fe-Cr-W-B-C elements by using PTA welding method. No porosity or cracks were encountered on the coated surfaces and interlayers.

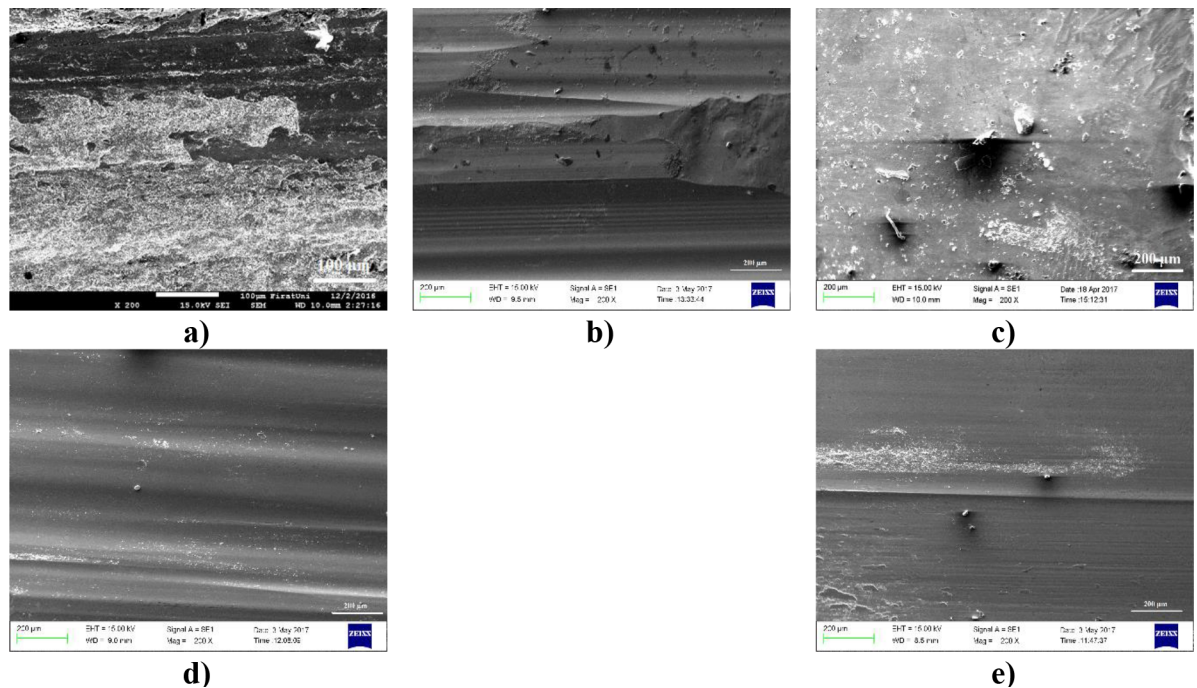

**Fig 12.** SEM photographs of the wear surface at 58.86 N load. a) AISI 1020, b) S1, c) S2, d) S3 and e) S4.

<https://doi.org/10.1371/journal.pone.0190243.g012>

- Coating layers depths and interface regions heights increased with increasing heat input.
- The coating layers mainly composed of  $M_{23}(C, B)_6$  ( $M = Cr, Fe, W$ ) carbide,  $M_7C_3$  ( $M = Cr, Fe, W$ ) carbide,  $(Cr, Fe)B$  boride,  $FeB$  boride and  $FeCr$ .
- Coating layers average microhardness were decreased with increasing heat input and maximum average microhardness was measured to be 1217 HV.
- The wear rates of the coated samples were lower than that of AISI 1020 steel and wear rates of the coating layers increased as their average microhardness decreased.
- The samples with higher average microhardness have higher friction coefficient and while heat input increased, friction coefficient decreased.

## Author Contributions

**Investigation:** Cihan Özel, Turan Gürgeç.

**Supervision:** Cihan Özel.

## References

1. Sadeghi F, Najafi H, Abbasi A. The effect of Ta substitution for Nb on the microstructure and wear resistance of an Fe-Cr-C hardfacing alloy. *Surface and Coatings Technology*. 2017; 324: 85–91.
2. Demian C, Denoirjean A, Pawłowski L, Denoirjean P, El Ouardi R. Microstructural investigations of NiCrAlY+ Y2O3 stabilized ZrO2 cermet coatings deposited by plasma transferred arc (PTA). *Surface and Coatings Technology*. 2016; 300: 104–109.
3. Acevedo-Dávila J, Muñoz-Arroyo R, Hdz-García H, Martínez A, Alvarez-Vera M, Hernández-García F. Cobalt-based PTA coatings, effects of addition of TiC nanoparticles. *Vacuum*. 2017; 143: 14–22.

4. Barbosa Nunes E, Cavalcante NE, Barreto AS, da Silva AÍN, Motta MF. Evaluation of the effect of heat input in superduplex stainless steel deposition by the plasma powder process. *Welding International*. 2017; 31(3): 173–183.
5. Buchely M, Gutierrez J, Leon L, Toro A. The effect of microstructure on abrasive wear of hardfacing alloys. *Wear*. 2005; 259(1): 52–61.
6. Huang H, Han G, Qian Z, Liu Z. Characterizing the magnetic memory signals on the surface of plasma transferred arc cladding coating under fatigue loads. *Journal of Magnetism and Magnetic Materials*. 2017; 443: 281–286.
7. Kiliçay K, Ulutan M. Effect of cryogenic treatment on tribological behaviour of TiC composite coatings. *Surface Engineering*. 2017; 33(12): 886–894.
8. Sawant MS, Jain N. Evaluation of stellite coatings by  $\mu$ -PTA powder, laser and PTA deposition processes. *Materials and Manufacturing Processes*. 2017 Aug 10. <https://doi.org/10.1080/10426914.2017.1364764>
9. Ferozhkhan MM, Kumar KG, Ravibharath R. Metallurgical Study of Stellite 6 Cladding on 309-16L Stainless Steel. *Arabian Journal for Science and Engineering*. 2017; 42(5): 2067–2074.
10. Liu S, Zhou Y, Xing X, Wang J, Yang Q. Refining effect of TiC on primary M7C3 in hypereutectic Fe-Cr-C harden-surface welding coating: Experimental research and first-principles calculation. *Journal of Alloys and Compounds*. 2017; 691: 239–249.
11. Gou J, Wang Y, Wang C, Chu R, Liu S. Effect of rare earth oxide nano-additives on micro-mechanical properties and erosion behavior of Fe-Cr-CB hardfacing alloys. *Journal of Alloys and Compounds*. 2017; 691: 800–810.
12. Lin Y-C, Chen H-M, Chen Y-C. Microstructures and wear properties of various clad layers of the Fe–W–C–B–Cr system. *Surface and Coatings Technology*. 2013; 236: 410–419.
13. Li M, Huang J, Zhu Y, Li Z. Effect of heat input on the microstructure of in-situ synthesized TiN–TiB/Ti based composite coating by laser cladding. *Surface and Coatings Technology*. 2012; 206(19–20): 4021–4026.
14. Wang X, Zhang M, Zou Z, Song S, Han F, Qu S. In situ production of Fe–TiC surface composite coatings by tungsten-inert gas heat source. *Surface and Coatings Technology*. 2006; 200(20–21): 6117–6122.
15. Li Q, Peng X, Peng T, Tang Q, Liu C, Shi X. Molecular dynamics simulations of coating process: influences of thermostat methods. *Journal of Computational and Theoretical Nanoscience*. 2016; 13(7): 4629–4633.
16. Li Q, Fu T, Peng T, Peng X, Liu C, Shi X. Coalescence of Cu contacted nanoparticles with different heating rates: A molecular dynamics study. *International Journal of Modern Physics B*. 2016; 30(30): 1650212-1650212-10.
17. Gürgeç T, Cihan Ö. Effect of Heat Input on Microstructure, Friction and Wear Properties of Fe-Cr-BC Coating on AISI 1020 Surface Coated by PTA Method. *Firat University Turkish Journal of Science & Technology*. 2017; 12(2): 43–52.
18. Ulutan M, Kiliçay K, Celik ON, Er Ü. Microstructure and wear behaviour of plasma transferred arc (PTA)-deposited FeCrC composite coatings on AISI 5115 steel. *Journal of Materials Processing Technology*. 2016; 236: 26–34.
19. Yongtao Z, Ledo M, Xiaojun W, Hanqian Z, Jinfu L. Evolution behavior of carbides in 2.25 Cr-1Mo-0.25 V steel. *Materials transactions*. 2009; 50(11): 2507–2511.
20. Wiecek K, Bała P, Stępień M, Cios G, Kozieł T. The characterization of cast Fe-Cr-C alloy. *Archives of Metallurgy and Materials*. 2015; 60(2): 779–782.
21. Sahin Y. Optimal testing parameters on the wear behaviour of various steels. *Materials & design*. 2006; 27(6): 455–460.
22. Matik U, Çıtak R. Influence of the heat treatment on hardness and adhesive wear performance of Ni-P deposit with low phosphorus content. *Materials Testing*. 2015; 57(5): 431–436.
23. Yuan Y, Li Z. Effects of rod carbide size, content, loading and sliding distance on the friction and wear behaviors of (Cr, Fe)7C3-reinforced  $\alpha$ -Fe based composite coating produced via PTA welding process. *Surface and Coatings Technology*. 2014; 248: 9–22.
